# Supplementary material
Source: PubMed Central journal article supplement (PMC3813870)
Supplement: 77f420daef7aaa210545943e8c484051_genetics.113.155192-4.pdf [file 77f420daef7aaa210545943e8c484051_genetics.113.155192-4.pdf]

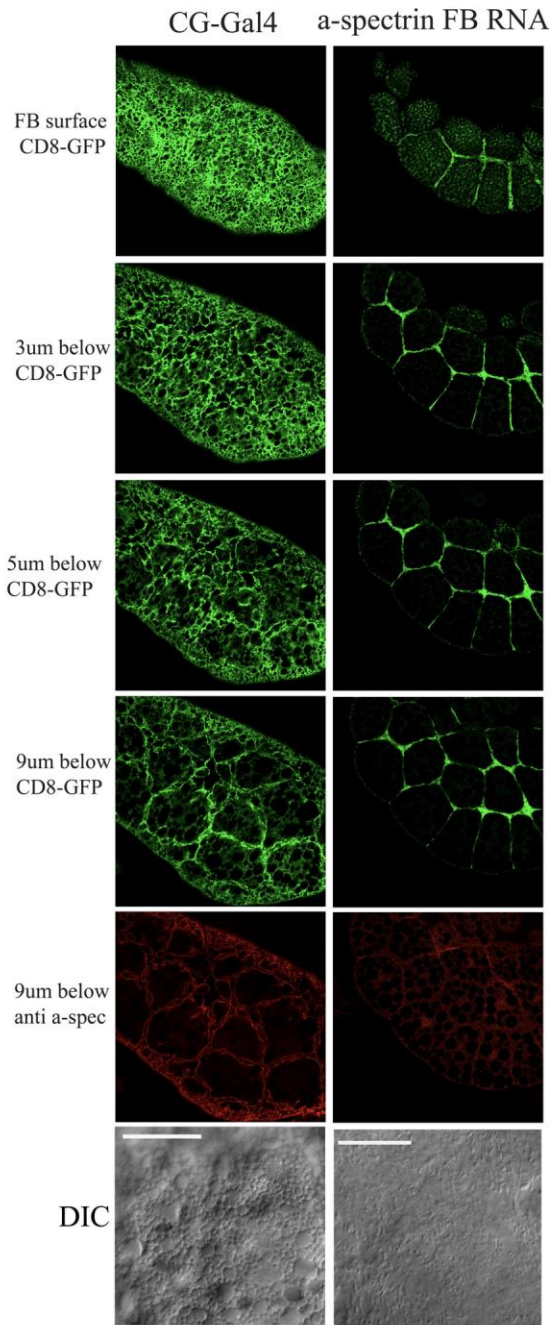

**Figure S2** Knockdown of  $\alpha$  spectrin produced the same effects on fat body morphology as  $\beta$  spectrin knockdown. The foamy appearance of the fat body surface detected via CD8-GFP was replaced by a speckled pattern on the ecto domain, as was observed with  $\beta$  spectrin RNAi. There was a concomitant loss of cortical lipid droplets as detected by DIC. Bar = 20  $\mu$ m.
