# Supplementary material
Source: PubMed Central journal article supplement (PMC3813870)
Supplement: 092b6534e61d4d6bbe9473dd63104fe9_genetics.113.155192-5.pdf [file 092b6534e61d4d6bbe9473dd63104fe9_genetics.113.155192-5.pdf]

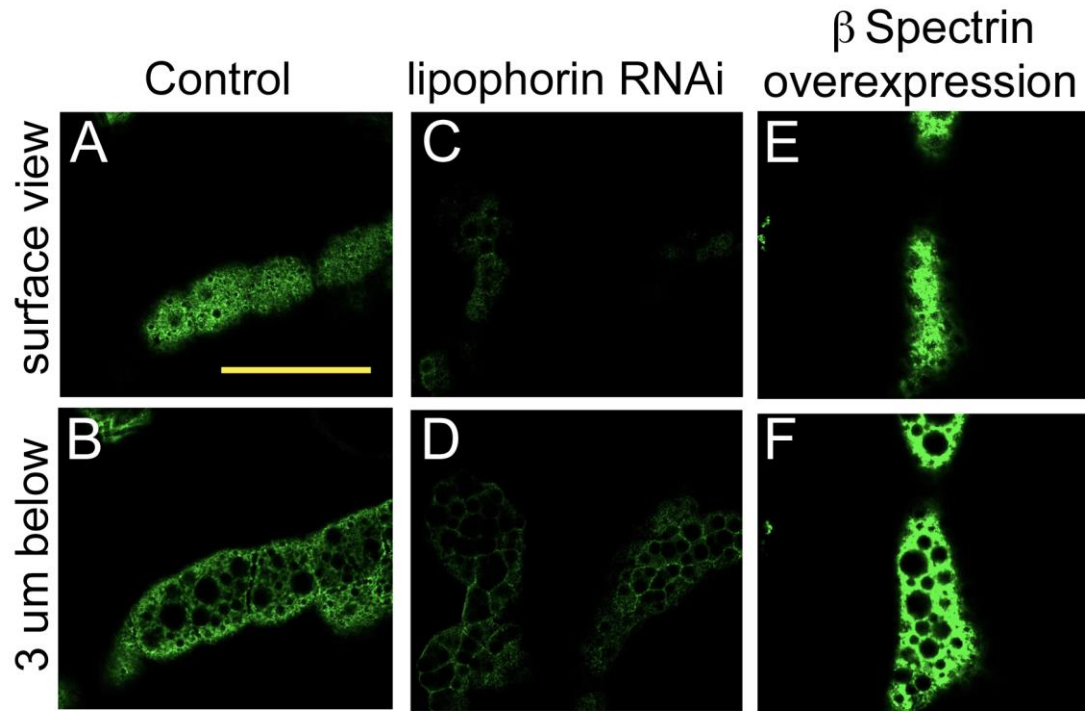

**Figure S6** Effects of UAS- $\beta$ -*Spec<sup>95</sup>* overexpression and lipophorin knockdown on lipophorin staining in larval fat body. The staining pattern in control fat body (A,B) was greatly diminished after dsRNA knockdown of lipophorin (C,D). Lipophorin staining became more intense upon  $\beta$  spectrin overexpression in fat body, which is consistent with a blockage of lipophorin secretion that leads to its accumulation at an abnormally high level. Bar = 50  $\mu$ m.
