# Supplementary material
Source: PubMed Central journal article supplement (PMC3813870)
Supplement: 3514ffb6029de1a6bf809abbdbc902cc_genetics.113.155192-7.pdf [file 3514ffb6029de1a6bf809abbdbc902cc_genetics.113.155192-7.pdf]

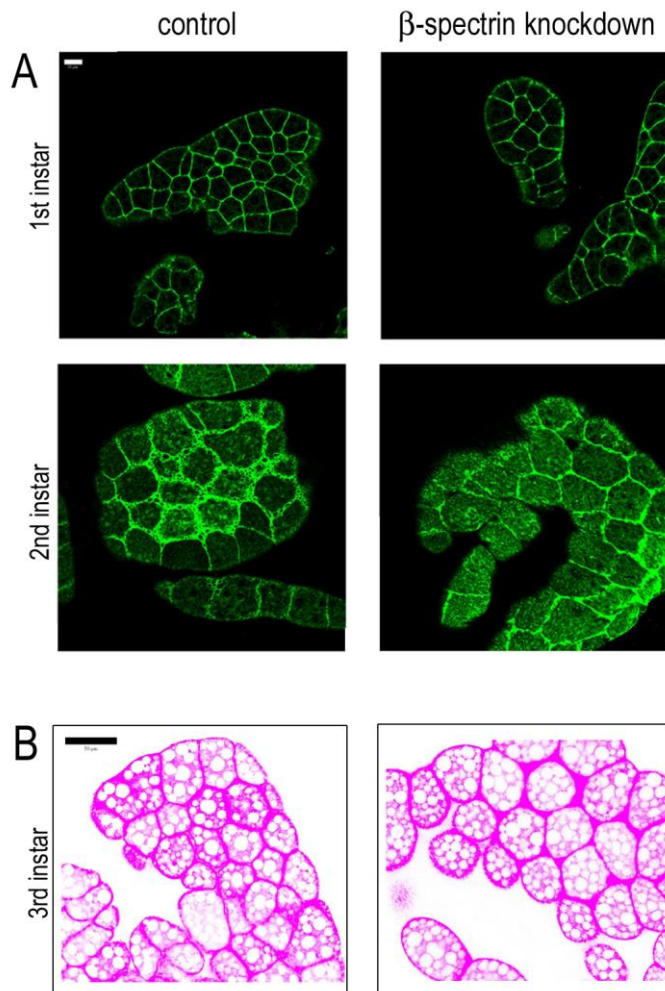

**Figure S1**  $\beta$  spectrin knockdown did not affect the size and shape of fat body cells, or the accumulation of large lipid droplets. A. The pattern of CD8-GFP fluorescence was essentially the same in wild type and  $\beta$  spectrin knockdown fat body cells at 1<sup>st</sup> instar and at 2<sup>nd</sup> instar, when cortical lipid droplets normally begin to appear. B. Displaying an overexposed image of CD8-GFP fluorescence as a negative helped to highlight the pattern of large lipid droplets at 3<sup>rd</sup> instar and showed that their size and number were similar to wild type after  $\beta$  spectrin knockdown. Bar = 1  $\mu$ m in A, 0.5  $\mu$ m in B.
