# Supplementary material
Source: PubMed Central journal article supplement (PMC3813870)
Supplement: b4f1cb1c1814290e76bf30fd45f4af6a_genetics.113.155192-3.pdf [file b4f1cb1c1814290e76bf30fd45f4af6a_genetics.113.155192-3.pdf]

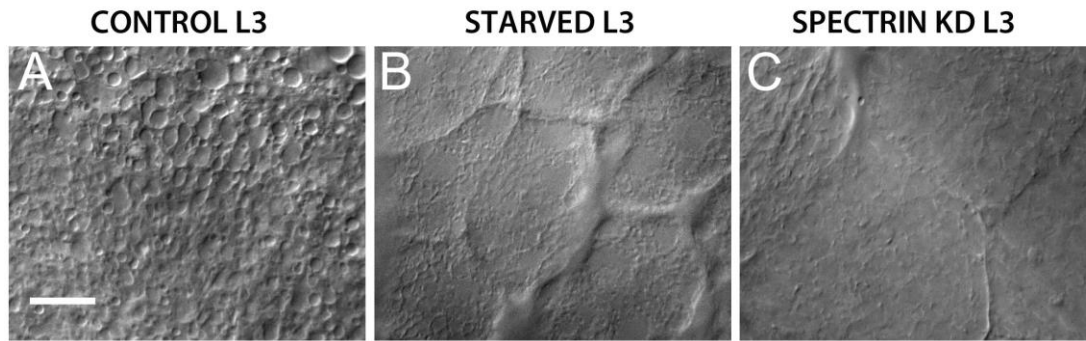

**Figure S3** Cortical lipid droplets were lost from larval fat body during starvation. The population of small lipid droplets seen in the cortical region of fat body from wild type 3<sup>rd</sup> instar larvae (A) were nearly absent after starvation (B) as found with  $\beta$  spectrin knockdown with dsRNA (C). Bar = 20  $\mu$ m.
