# Supplementary material
Source: PubMed Central journal article supplement (PMC3813870)
Supplement: ddb6cbf7e77d23f8fee176a973e6e7b3_genetics.113.155192-2.pdf [file ddb6cbf7e77d23f8fee176a973e6e7b3_genetics.113.155192-2.pdf]

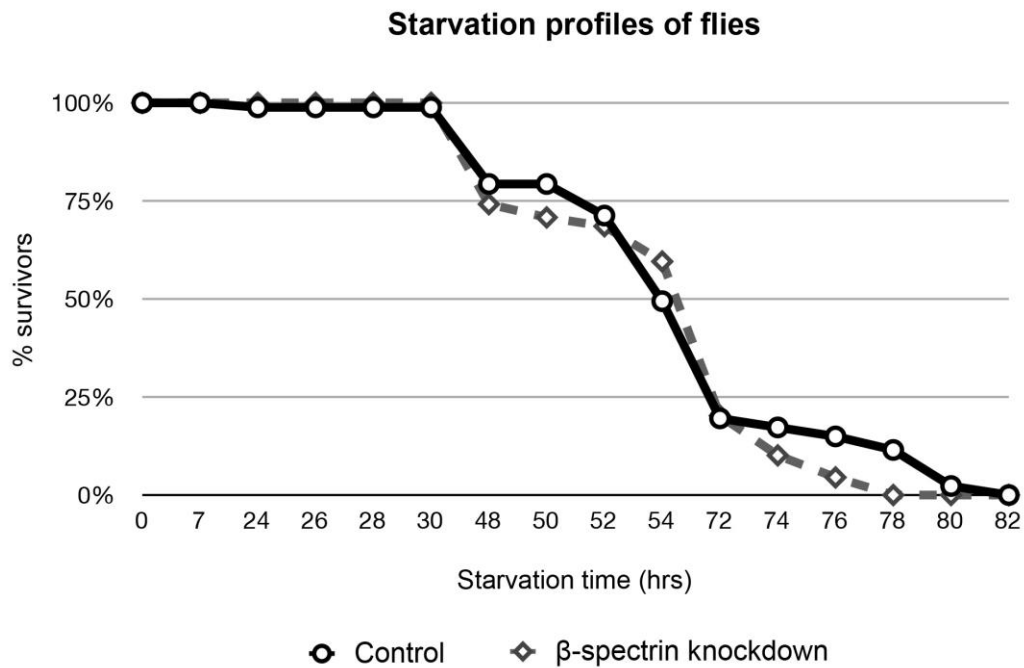

**Figure S4** Starvation susceptibility profiles of control and  $\beta$  spectrin knockdown adults. Adult flies less than 24 hrs of age were transferred to agar vials containing water but no nutrients and kept at 25°C. 87 control (parental lines: UAS  $\beta$ Spec<sup>dsRNA</sup> and Cg-Gal4) and 89  $\beta$  spectrin knockdown adults (UAS  $\beta$ Spec<sup>dsRNA</sup> X Cg-Gal4) were analyzed. Starvation susceptibility was tabulated as per cent survivors at the indicated times. It was previously shown that increased starvation susceptibility in *Lsd-2* mutants reflects a diminution of triacylglycerol stores compared to wild type (Gronke et al 2003). No such change was observed here with loss of spectrin function, suggesting that triacylglycerol stores were not altered. Thus, there appear to be effects of *Lsd-2* beyond their requirement for cortical lipid droplet formation.
